# Supplementary material for: Intramolecular interaction of synthetic chlorophyll heterodyads with different π-skeletons
Source: Royal Society of Chemistry journal article supplement (doi:10.1039/c9pp00373h), 2020-01-14
Supplement: c9pp00373h1.pdf [file c9pp00373h1.pdf]

*Electronic supplementary information for*

**Intramolecular interaction of synthetic chlorophyll  
heterodyads with different  $\pi$ -skeletons**

Hitoshi Tamiaki,\* Kazuhiro Fukai and Soichi Nakamura

*Graduate School of Life Sciences, Ritsumeikan University, Kusatsu, Shiga 525-8577, Japan.*

*E-mail: tamiaki@fc.ritsumei.ac.jp*

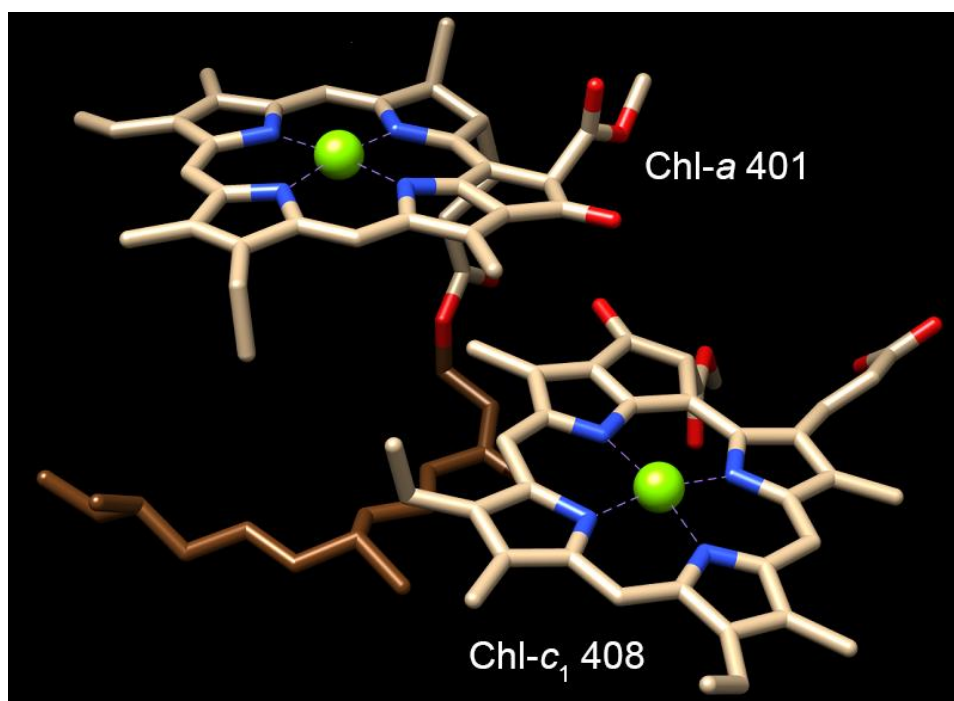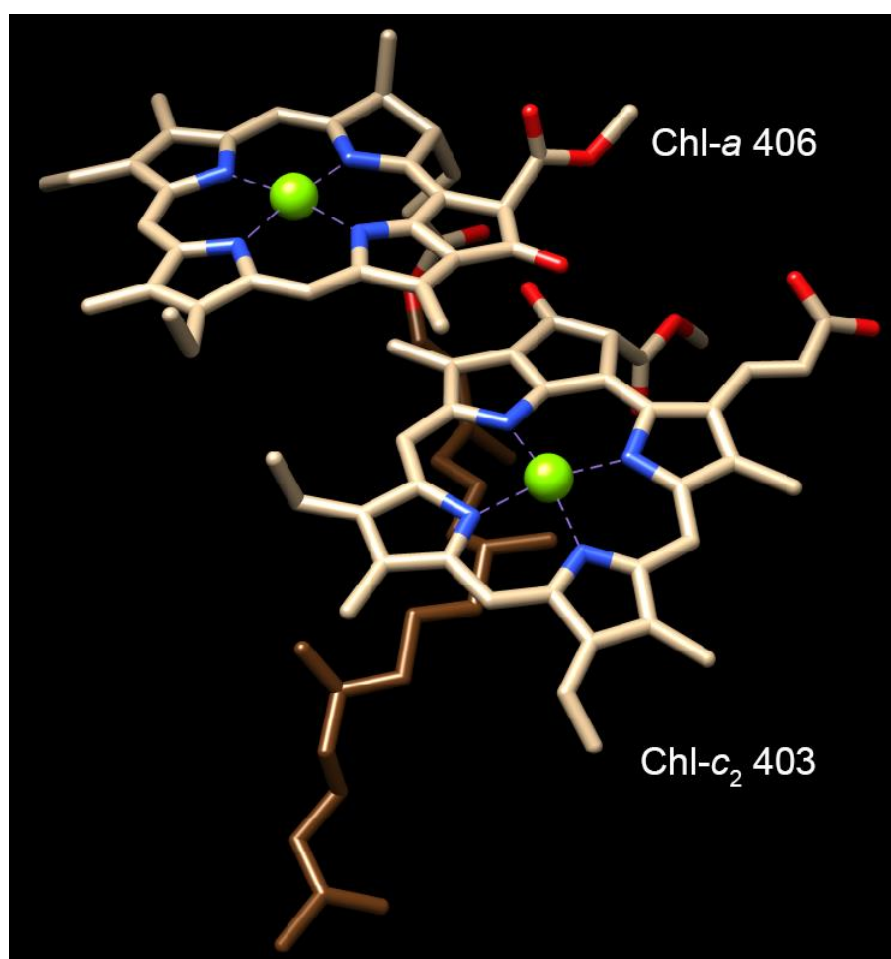

**Fig. S1** Interaction of Chl-*a* 401 with Chl-*c*<sub>1</sub> 408 (upper) and Chl-*a* 406 with Chl-*c*<sub>2</sub> 403 (upper) in FCP based on PDB #6A2W.

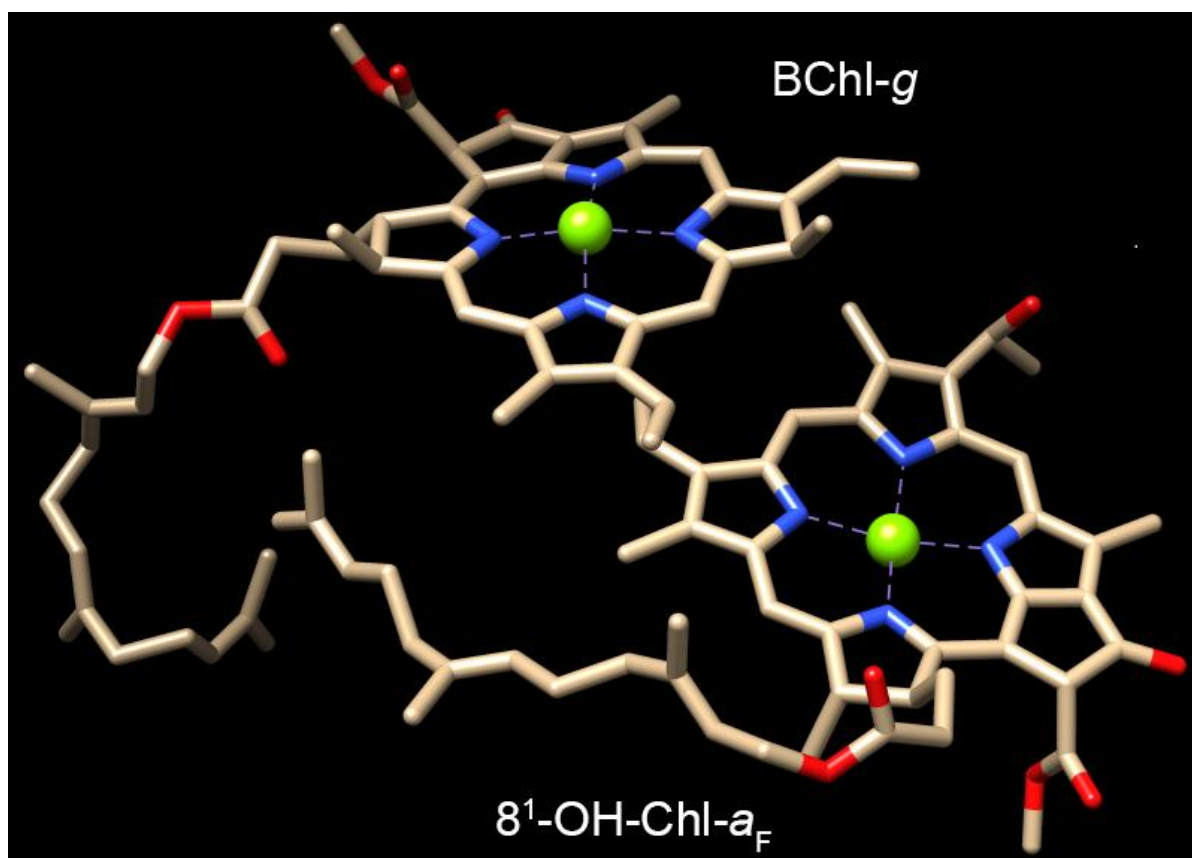

**Fig. S2** Interaction of BChl-*g* with 8<sup>1</sup>-OH-Chl-*a<sub>F</sub>* in heliobacterial RC based on PDB #5V8K.

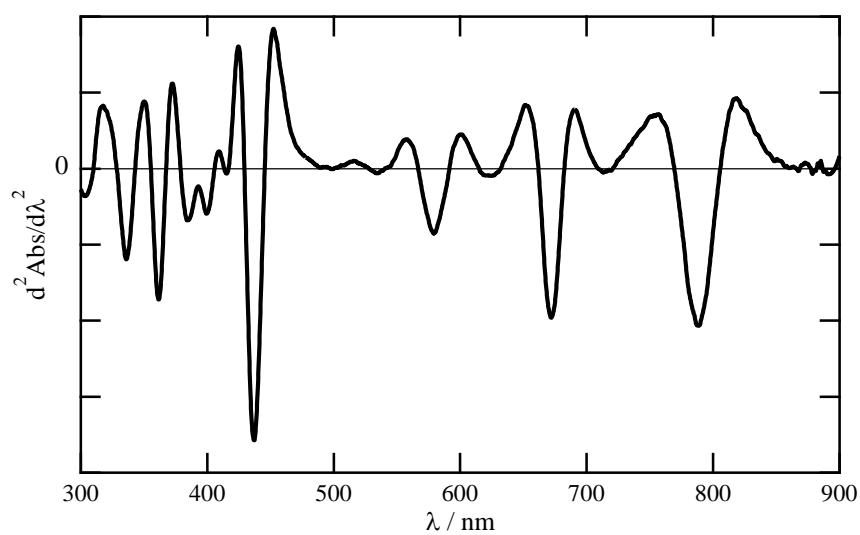

**Fig. S3** Second derivative in electronic absorption spectrum of **ZnB-ZnC** (5 μM) in 1% (v/v) methanol and benzene.

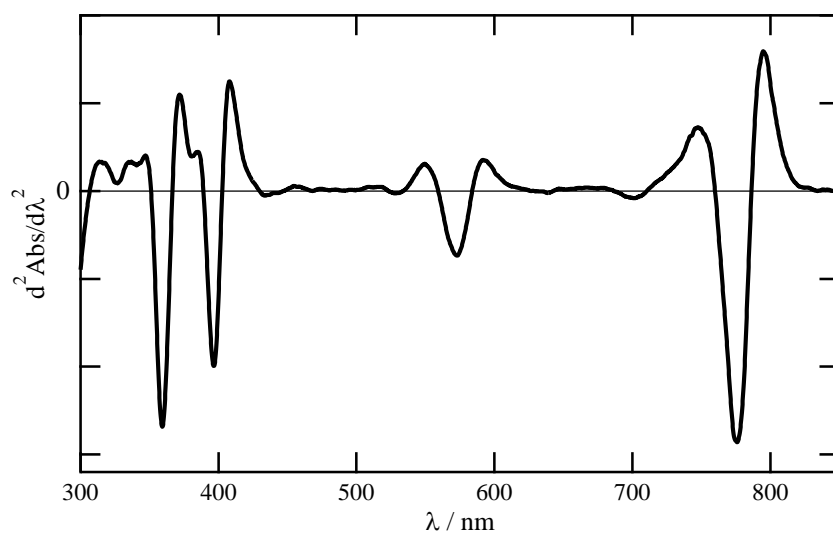

**Fig. S4** Second derivative in electronic absorption spectrum of **ZnB** (5 μM) in 1% (v/v) methanol and benzene.

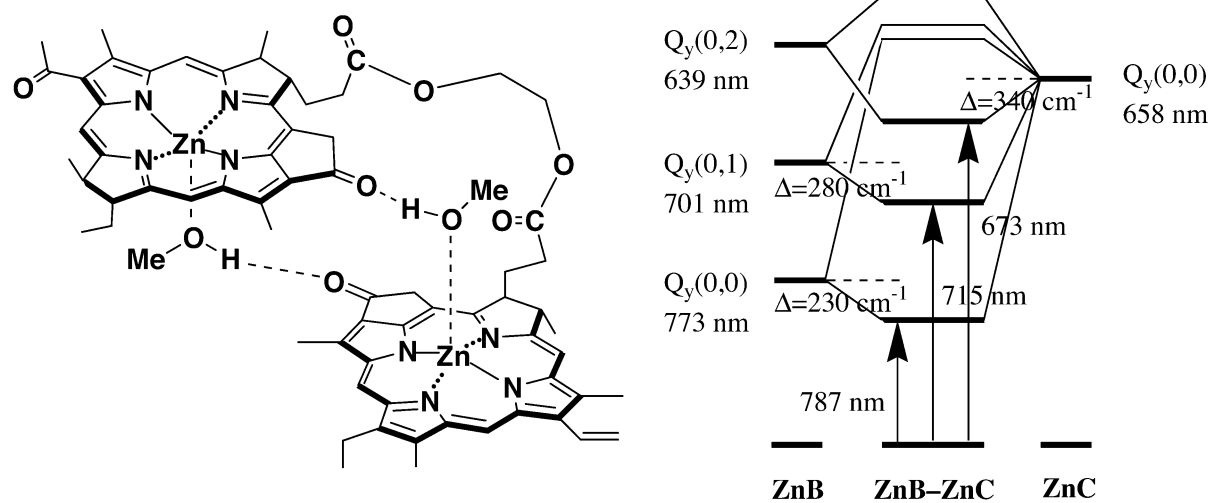

**Fig. S5** Proposed conformers of methanol-locked heterodiyads (left) and the estimated energy levels of their excitonically coupled Q<sub>y</sub> bands (right): **ZnC–ZnP**·2MeOH (upper) and **ZnB–ZnC**·2MeOH (lower).

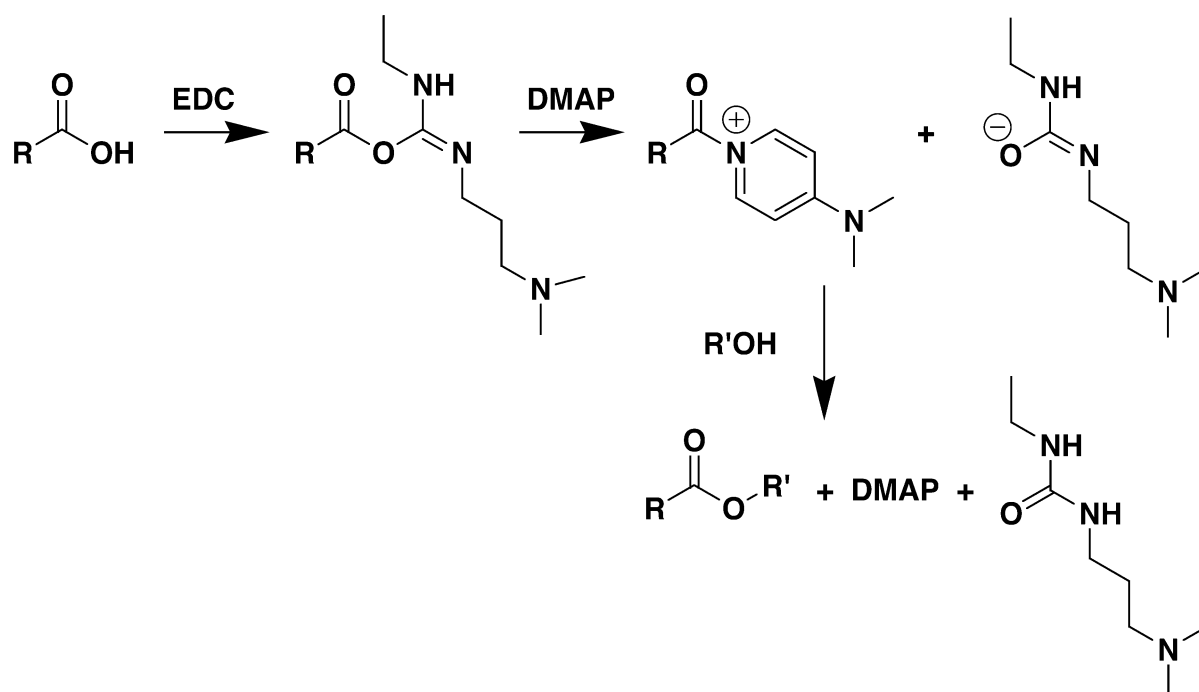

**Scheme S1** Steglich esterification of carboxylic acid ( $RCOOH$ ) with alcohol ( $R'OH$ ) using EDC and DMAP [step (vii) in Fig. 5].
